# Supplementary material for: PAM/graphene/Ag ternary hydrogel: synthesis, characterization and catalytic application
Source: Royal Society of Chemistry journal article supplement (doi:10.1039/c4ta01620c), 2014-01-01
Supplement: c4ta01620c1.pdf [file c4ta01620c1.pdf]

# Supporting Information

## **PAM/graphene/Ag ternary hydrogel: synthesis, characterization and catalytic application**

Huawen Hu, John H. Xin,\* Hong Hu\*

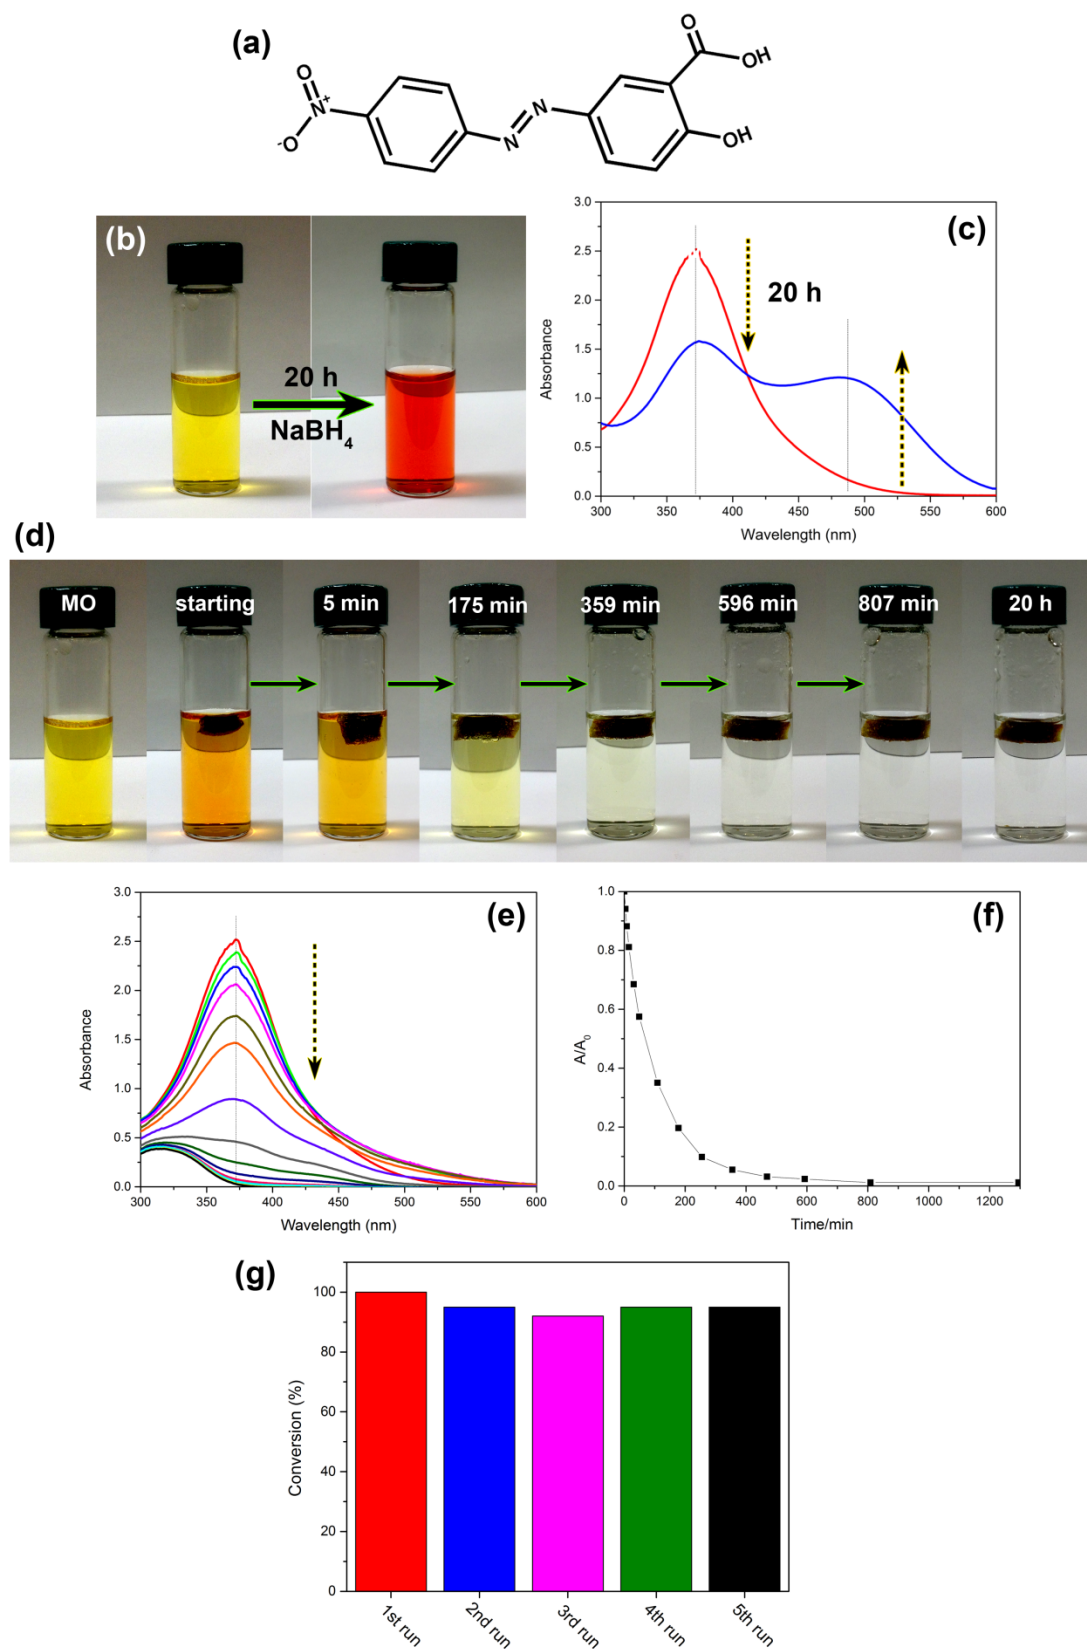

**Fig. S1** Catalytic activity test results for PAM/1.7G/Ag using an azo-based dye, in this case MO, as the catalysant.

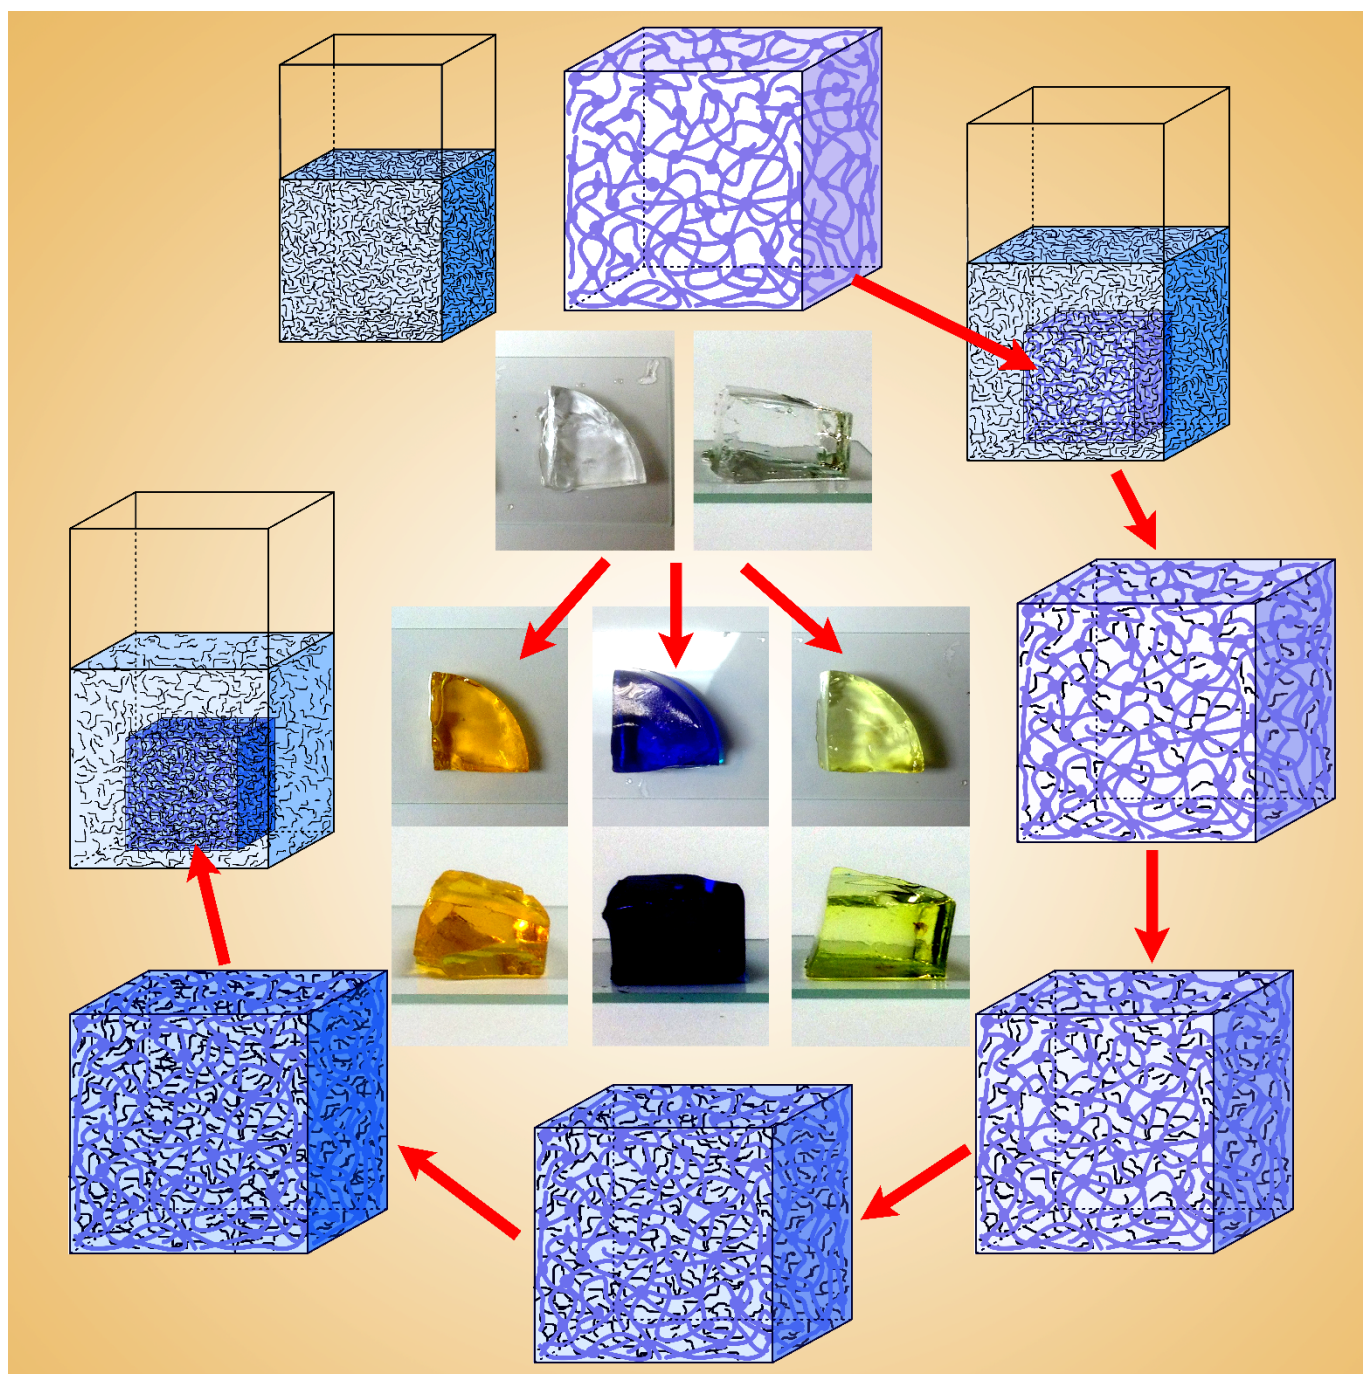

**Fig. S2** Digital images and structural models showing the adsorption capacity of the PAM hydrogel towards the three catalyst targets used in this study, namely MB, MO and 4-NP. The evolution of adsorption of catalyst molecules is revealed by these structural models.
